# Supplementary material
Source: Springer Nature journal article supplement (https://www.springermedizin.de/resource/supplementary/12981_2009_115_MOESM1_ESM.pdf/9603858)

**A.**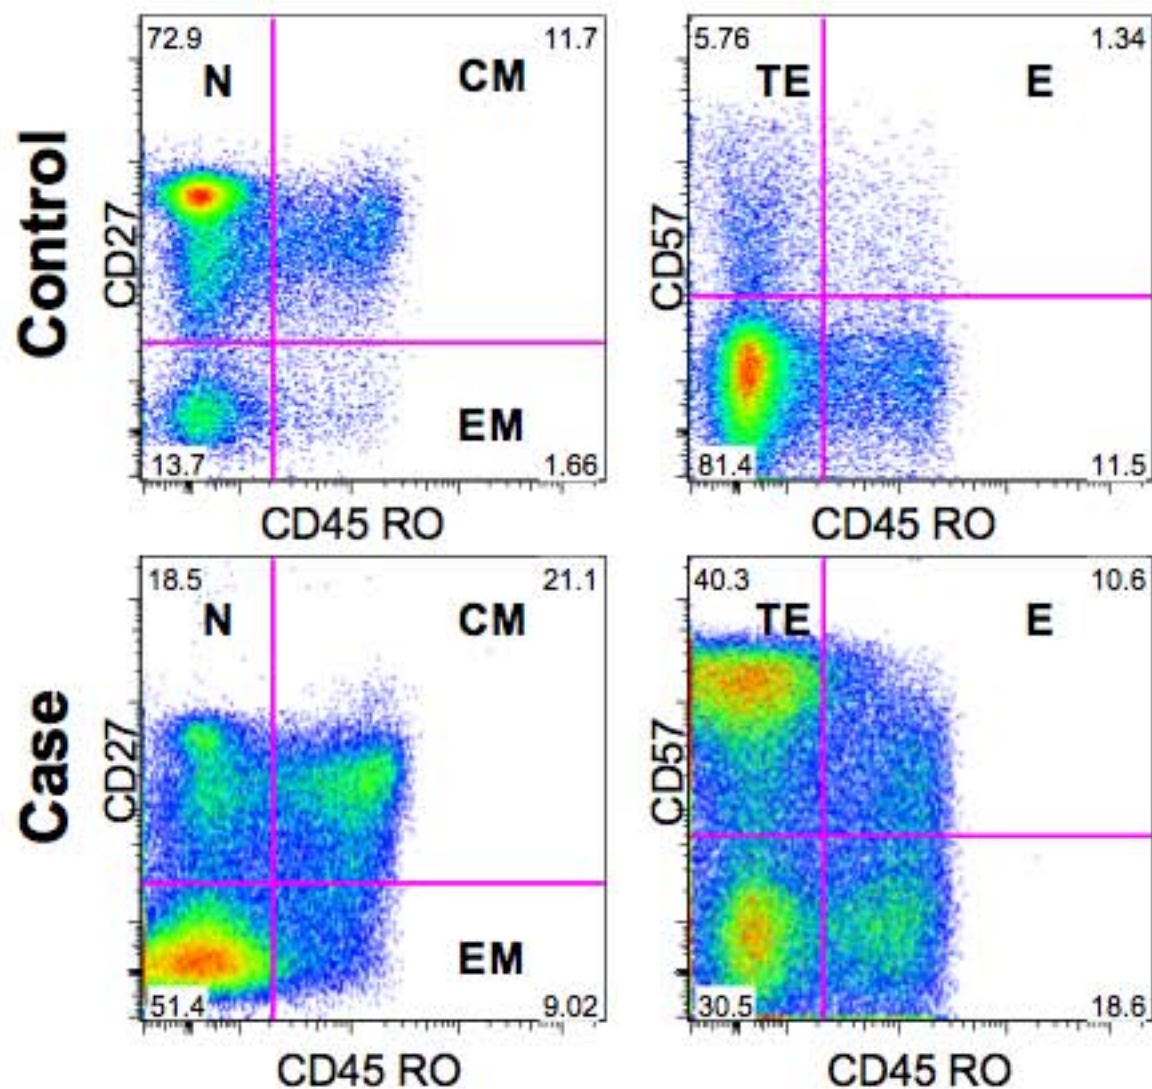**B.**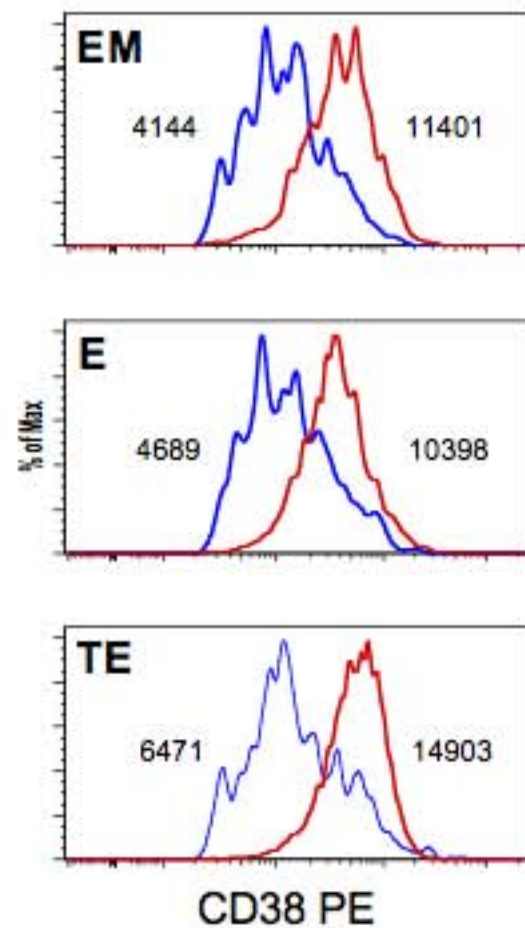

Supplement: MOESM1 [file 9603858]
